# Supplementary material for: Sex-Specific Links Between Organ Aging and Heart Failure Severity and Differential Impact of Diabetes and TyG-BMI
Source: Research Square preprint supplement (doi:10.21203/rs.3.rs-7344670/v1), 2025-08-27
Supplement: Supplementary file 1 [file 13d194f90ba17e861437e656.docx]

**Supplementary Figure 1.** Flowchart of study population selection from the HELPFul cohort

**Supplementary Figure 2.** Correlation between chronological age and predicted organ age across aging models

**Supplementary Figure 3.** Correlation between various organ aging acceleration

**Supplementary Figure 4.** Associations between organ aging acceleration and log odds of heart failure stage C/D

**Supplementary Table 1.** Baseline characteristics comparison between overall HELPFul population and study population

**Supplementary Table 2.** Summary of missing values

**Supplementary Table 3.** Echocardiographic characteristics of HELPFul study participants stratified by heart failure stage

**Supplementary Table 4.** Associations between advanced/youthful OAA amount and heart failure stage

**Supplementary Table 5.** Associations between organ aging acceleration and echocardiographic markers

**Supplementary Table 6.** Multivariable regression analysis between clinical risk factors and organ aging acceleration

**Supplementary Table 7.** Regression analysis between individual clinical risk factors and organ aging acceleration

**Supplementary Figure 1.** Flowchart of study population selection from the HELPFul cohort

A total of 556 participants from HELPFul cohort (n=880) were included in the final analysis. HF, heart failure. QC, quality control.

**Supplementary Figure 2.** Correlation between chronological age and predicted organ age across aging modelsScatter plots display the relationship between chronological age and predicted age derived from four aging models: artery, heart, kidney, and a conventional model. Each dot represents an individual. The black solid line represents a LOWESS fit, illustrating the population-level trend. Pearson correlation coefficients (r) and corresponding *P* values are shown.

**Supplementary Figure 3.** Correlation between various organ aging acceleration

OAA, organ aging acceleration. Dot plots showing the correlation between various organ aging acceleration. Pearson's correlation test was used to assess the relationships, with the correlation coefficient (r) and *P* value displayed for each pair.

**Supplementary Figure 4.** Associations between organ aging acceleration and log odds of heart failure stage C/D

OAA, organ aging acceleration. A line graph portrays the relationship between the log of the odds ratio and OAA. The line intersects the y axis, indicated by the dashed purple line. Gray area indicates the confidence interval.

| **Supplementary Table 1.** Baseline characteristics comparison between overall HELPFul population and study population | | |
| --- | --- | --- |
|  | **Overall population (n=880)** | **Study population (n=556)** |
| **Demographics** |  |  |
| Age, years | 63 (9) | 63 (9) |
| Women, n (%) | 604 (69) | 364 (66) |
| Body Mass Index, kg/m2 | 27.2 (4.5) | 27.1 (4.2) |
| Current smoker, n (%) | 79 (9) | 56 (10) |
| **Clinical/Lab measures** |  |  |
| Hypertension, n (%) | 504 (57) | 314 (57) |
| Systolic blood pressure, mmHg | 143 (18) | 144 (18) |
| Diastolic blood pressure, mmHg | 85 (10) | 86 (10) |
| Diabetes, n (%) | 69 (8) | 42 (8) |
| Atrial fibrillation, n (%) | 22 (4) | 15 (4) |
| Total cholesterol, mmol/L | 5.30 (1.15) | 5.29 (1.16) |
| LDL cholesterol, mmol/L | 3.03 (1.07) | 2.99 (1.10) |
| HDL cholesterol, mmol/L | 2.14 (1.70) | 1.60 (1.04) |
| Triglyceride, mmol/L | 1.73 (1.14) | 1.72 (1.18) |
| Serum creatinine, mg/dL | 0.78 (0.15) | 0.78 (0.16) |
| eGFR (CKD-EPI), mL/min/1.73m² | 95 [86, 100] | 95 [87, 100] |
| HbA1c, mmol/L | 36.64 (6.18) | 36.45 (5.78) |
| Anti-hypertensives use, n (%) | 296 (34) | 184 (33) |
| Statin use, n (%) | 187 (21) | 124 (22) |
| Heart Failure stage, n (%) |  |  |
| Stage A | 295 (34) | 195 (35) |
| Stage B | 262 (30) | 162 (29) |
| Stage C/D | 319 (36) | 199 (36) |

**eGFR, estimated glomerular filtration rate (CKD-EPI equation). HbA1c, hemoglobin A1c. HDL, high density lipoprotein. LDL, low-density lipoprotein.**

| **Supplementary Table 2.** Summary of missing values | |
| --- | --- |
| **Variables** | **Missing, %** |
| Current smoker | 1.3 |
| Systolic blood pressure | 0.9 |
| Diastolic blood pressure | 0.9 |
| Total cholesterol | 2.3 |
| LDL cholesterol | 35.2 |
| HDL cholesterol | 2.3 |
| Triglyceride | 7.9 |
| Blood glucose | 37.4 |
| HbA1c | 0.9 |
| Serum creatinine | 7.7 |
| eGFR | 7.7 |
| NT-proBNP | 0.9 |
| CTI | 37.8 |
| TyG-BMI | 37.6 |
| TG/HDL | 2.3 |
| EF | 5.4 |
| e' | 0.9 |
| E/e' ratio | 3.4 |
| E/A ratio | 4.0 |
| LAVI | 5.6 |

**CTI, C-reactive protein–triglyceride glucose index. eGFR, estimated glomerular filtration rate (CKD-EPI equation). HbA1c, hemoglobin A1c. HDL, high-density lipoprotein.** e', the early diastolic velocity of the mitral annulus. E/e' ratio: early diastolic filling velocity (E) to the early diastolic mitral annular velocity (E’). EF, left ventricular ejection fraction. LAVI, left atrium volume index. **LDL, low-density lipoprotein. NT-proBNP, N-terminal pro–B-type natriuretic peptide. TG/HDL, triglyceride-to-HDL cholesterol ratio. TyG-BMI, triglyceride-glucose index multiplied by body mass index.**

| **Supplementary Table 3.** Echocardiographic characteristics of HELPFul study participants stratified by heart failure stage | | | | | |
| --- | --- | --- | --- | --- | --- |
|  | **Overall** | **Stage A** | **Stage B** | **Stage C/D** | ***P*** |
| n | 556 | 195 | 162 | 199 |  |
| EF, % | 67.28 (8.18) | 68.35 (7.96) | 66.78 (7.92) | 66.62 (8.54) | 0.083 |
| PWTd, mm | 9.43 (1.55) | 8.65 (1.28) | 9.97 (1.72) | 9.75 (1.35) | <0.001 |
| LVMI, g/m2 | 74.84 (19.20) | 66.68 (14.65) | 78.93 (19.49) | 79.51 (20.32) | <0.001 |
| e', cm/s | 7.85 (2.65) | 9.15 (1.77) | 7.10 (1.54) | 7.17 (3.49) | <0.001 |
| E/e' ratio | 9.32 (2.64) | 8.12 (2.06) | 9.71 (2.28) | 10.19 (3.00) | <0.001 |
| E/A ratio | 0.96 (0.38) | 1.08 (0.31) | 0.88 (0.27) | 0.91 (0.47) | <0.001 |
| LAVI, mL/m2 | 25.59 (9.14) | 22.94 (7.79) | 27.06 (8.97) | 27.00 (9.93) | <0.001 |

e', the early diastolic velocity of the mitral annulus. E/e' ratio: early diastolic filling velocity (E) to the early diastolic mitral annular velocity (E’). EF, left ventricular ejection fraction. LAVI, left atrium volume index. LVMI, left ventricular mass index. PWTd, posterior wall thickness.

| **Supplementary Table 4.** Associations between advanced/youthful OAA amount and heart failure stage | | | | |
| --- | --- | --- | --- | --- |
|  | **Stage A** | **Stage B**  **OR (95% CI)** | **Stage C/D**  **OR (95% CI)** | **Interaction *P* value** |
| **Advanced OAA amount** |  |  |  |  |
| **Total population (n=556)** |  |  |  | 0.161 |
| 1 vs 0 | reference | 1.32 (0.81, 2.14) | **1. 91 (1.18, 3.10) *** |  |
| ≥2 vs 0 | reference | 1.52 (0.77, 3.00) | **3.08 (1.64, 5.79) *** |  |
| **Women (n=364)** | | | | |
| 1 vs 0 | reference | 1.11 (0.59, 2.08) | **1.46 (0.82, 2.62) *** |  |
| ≥2 vs 0 | reference | 1.57 (0.64, 3.86) | **3.21 (1.47, 7.07) *** |  |
| **Men (n=193)** | | | | |
| 1 vs 0 | reference | 1.88 (0.86, 4.10) | **3.89 (1.56, 9.67) *** |  |
| ≥2 vs 0 | reference | 1.59 (0.55, 4.56) | **3.70 (1.17, 11.68) *** |  |
| **Youthful OAA amount** |  |  |  |  |
| **Total population (n=556)** |  |  |  | 0.510 |
| 1 vs 0 | reference | 1.00 (0.61, 1.64) | 0.73 (0.46, 1.19) |  |
| ≥2 vs 0 | reference | 1.15 (0.62, 2.10) | 0.85 (0.47, 1.56) |  |
| **Women (n=364)** |  |  |  |  |
| 1 vs 0 | reference | 1.01 (0.54, 1.92) | 0.89 (0.50, 1.57) |  |
| ≥2 vs 0 | reference | 0.91 (0.40, 2.04) | 0.77 (0.37, 1.61) |  |
| **Men (n=193)** |  |  |  |  |
| 1 vs 0 | reference | 0.95 (0.43, 2.10) | 0.45 (0.18, 1.11) |  |
| ≥2 vs 0 | reference | 1.45 (0.56, 3.77) | 0.87 (0.30, 2.48) |  |

CI, confidence interval. OAA, organ aging acceleration. OR, odds ratio. The association between determinants and outcomes is assessed by multinominal regression models. Analysis is adjusted for age and sex in the non-stratified analysis and for age only in the stratified analysis. Interaction p value: Indicates the statistical significance of differences in associations between men and women. Values in bold are statistically significant at *P* < 0.05. * indicates that the result remained significant after controlling for multiple testing using the Benjamini–Hochberg false discovery rate procedure.

| **Supplementary Table 5.** Associations between organ aging acceleration and echocardiographic markers | | | | | | |
| --- | --- | --- | --- | --- | --- | --- |
|  | **E/e’**  **β (95% CI)** | **Interaction *P* value** | **LVMI, g/m2**  **β (95% CI)** | **Interaction *P* value** | **EF, %**  **β (95% CI)** | **Interaction *P* value** |
| **Total population** **(n=556)** | |  |  |  |  |  |
| Artery | -0.04 (-0.10, 0.03) | 0.876 | 0.31 (-0.12, 0.74) | **0.003*** | -0.20 (-0.40, 0.00) | 0.552 |
| Heart | 0.03 (-0.04, 0.09) | 0.924 | **1.11 (0.66, 1.55) *** | 0.010 | **-0.22 (-0.43, -0.01)** | **0.004*** |
| Kidney | 0.05 (-0.06, 0.16) | 0.648 | 0.32 (-0.44, 1.08) | 0.971 | -0.13 (-0.48, 0.22) | 0.679 |
| Conventional | -0.01 (-0.08, 0.05) | 0.171 | **0.56 (0.10, 1.03)** | 0.024 | **-0.24 (-0.46, -0.01)** | 0.201 |
| **Women (n=364)** | |  |  |  |  |  |
| Artery | -0.03 (-0.10, 0.04) |  | -0.14 (-0.59, 0.31) |  | -0.15 (-0.38, 0.09) |  |
| Heart | 0.03 (-0.05, 0.12) |  | **0.58 (0.07, 1.10)** |  | 0.06 (-0.21, 0.33) |  |
| Kidney | 0.03 (-0.09, 0.15) |  | 0.35 (-0.43, 1.13) |  | -0.09 (-0.50, 0.31) |  |
| Conventional | 0.02 (-0.06, 0.10) |  | 0.17 (-0.32, 0.66) |  | -0.13 (-0.40, 0.14) |  |
| **Men** **(n=193)** | |  |  |  |  |  |
| Artery | -0.03 (-0.15, 0.09) |  | **1.24 (0.27, 2.21)** |  | -0.24 (-0.63, 0.15) |  |
| Heart | 0.03 (-0.07, 0.14) |  | **1.75 (0.93, 2.58) *** |  | **-0.53 (-0.86, -0.20) *** |  |
| Kidney | 0.08 (-0.13, 0.30) |  | 0.32 (-1.39, 2.23) |  | -0.25 (-0.93, 0.43) |  |
| Conventional | -0.07 (-0.19, 0.05) |  | **1.28 (0.31, 2.24) *** |  | **-0.42 (-0.81, -0.03) *** |  |

CI, confidence interval. E/e' ratio, early diastolic filling velocity (E) to the early diastolic mitral annular velocity (e’). EF, left ventricular ejection fraction. LVMI, left ventricular mass index. The association between determinants and outcomes is assessed by linear regression models and the regression coefficient along with its 95% confidence interval is displayed. Analysis is adjusted for age and sex in the non-stratified analysis and for age only in the stratified analysis. Interaction *P* value: Indicates the statistical significance of differences in associations between men and women. Values in bold are statistically significant at p < 0.05. * indicates that the result remained significant after controlling for multiple testing using the Benjamini–Hochberg false discovery rate procedure.

| **Supplementary Table 6.** Multivariable regression analysis between clinical risk factors and organ aging acceleration | | | | | | | | |
| --- | --- | --- | --- | --- | --- | --- | --- | --- |
|  | **Artery**  **β (95% CI)** | **Interaction *P* value** | **Heart**  **β (95% CI)** | **Interaction *P* value** | **Kidney**  **β (95% CI)** | **Interaction *P* value** | **Conventional**  **β (95% CI)** | **Interaction *P* value** |
| **Total population (n=556)** | |  |  |  |  |  |  |  |
| Current smoker | -0.46 (-1.41, 0.49) | 0.891 | 0.20 (-0.72, 1,12) | 0.499 | **0.68 (0.16, 1.20) *** | 0.900 | 0.26 (-0.63, 1.15) | 0.721 |
| Hypertension | -0.25 (-0.86, 0.35) | 0.170 | -0.19 (-0.77, 0.40) | 0.905 | 0.29 (-0.04, 0.62) | 0.366 | -0.10 (-0.67, 0.47) | 0.484 |
| BMI, kg/m2 | -0.02 (-0.09, 0.05) | 0.664 | -0.04 (-0.11, 0.03) | 0.490 | **0.10 (0.06, 0.14) *** | 0.132 | 0.03 (-0.04, 0.09) | 0.934 |
| Diabetes | **2.16 (1.03, 3.29) *** | 0.324 | 0.41 (-0.68, 1.50) | 0.800 | **0.88 (0.26, 1.50) *** | 0.229 | **1.10 (0.05, 2.16)** | 0.783 |
| Dyslipidemia | 0.20 (-0.41, 0.81) | 0.112 | -0.30 (-0.89, 0.29) | 0.141 | 0.12 (-0.21, 0.46) | 0.620 | -0.01 (-0.59, 0.56) | 0.379 |
| Creatinine, mg/dL | 0.77 (-1.53, 3.07) | 0.717 | 1.64 (-0.55, 3.83) | 0.630 | 0.17 (-0.11, 1.40) | 0.635 | 1.81 (-0.29, 3.90) | 0.211 |
| **Women (n=364)** | |  |  |  |  |  |  |  |
| Current smoker | -0.51 (-1.74, 0.72) |  | -0.22 (-1.29, 0.85) |  | **0.69 (0.02, 1.36)** |  | 0.37 (-0.74, 1.49) |  |
| Hypertension | -0.40 (-1.17, 0.37) |  | -0.02 (-0.68, 0.65) |  | 0.13 (-0.29, 0.55) |  | -0.28 (-0.97, 0.42) |  |
| BMI, kg/m2 | -0.01 (-0.10, 0.07) |  | -0.07 (-0.14, 0.00) |  | **0.12 (0.07, 0.16) *** |  | 0.02 (-0.06, 0.10) |  |
| Diabetes | **1.84 (0.22, 3.45)** |  | 0.55 (-0.84, 1.95) |  | **1.20 (0.32, 2.08) *** |  | 1.27 (-0.19, 2.74) |  |
| Dyslipidemia | 0.04 (-0.74, 0.81) |  | -0.53 (-1.20, 0.14) |  | 0.02 (-0.40, 0.45) |  | 0.21 (-0.49, 0.91) |  |
| Creatinine, mg/dL | 0.93 (-0.23, 4.16) |  | 1.56 (-1.28, 4.39) |  | -0.19 (-1.94, 1.56) |  | **3.41 (0.48, 6.34)** |  |
| **Men (n=193)** | |  |  |  |  |  |  |  |
| Current smoker | -0.65 (-2.13, 0.84) |  | 0.49 (-1.25, 2.22) |  | 0.71 (-0.16, 1.58) |  | 0.12 (-1.41, 1.65) |  |
| Hypertension | 0.02 (-0.97, 1.00) |  | -0.54 (-1.70, 0.62) |  | **0.66 (0.10, 1.22)** |  | 0.24 (-0.78, 1.24) |  |
| BMI, kg/m2 | -0.02 (-0.15, 0.11) |  | 0.04 (-0.11, 0.20) |  | 0.04 (-0.04, 0.11) |  | 0.03 (-0.10, 0.17) |  |
| Diabetes | **2.23 (0.66, 3.81)** |  | 0.14 (-1.72, 1.99) |  | 0.40 (-0.49, 1.30) |  | 1.03 (-0.57, 2.64) |  |
| Dyslipidemia | 0.63 (-0.38, 1.64) |  | 0.31 (-0.89, 1.50) |  | 0.20 (-0.38, 0.78) |  | -0.47 (-1.50, 0.56) |  |
| Creatinine, mg/dL | 0.92 (-2.25, 4.09) |  | 1.95 (-1.70, 5.60) |  | 0.84 (-0.89, 2.57) |  | 0.38 (-2.77, 3.54) |  |

BMI, body mass index. CI, confidence interval. The association between determinants and outcomes is assessed by linear regression models and the regression coefficient along with its 95% confidence interval is displayed. Analysis is adjusted for age and sex in the non-stratified analysis and for age only in the stratified analysis. Interaction p value: Indicates the statistical significance of differences in associations between men and women. Values in bold are statistically significant at *P* < 0.05. * indicates that the result remained significant after controlling for multiple testing using the Benjamini–Hochberg false discovery rate procedure. Values in bold are statistically significant at *P* < 0.05. An asterisk (*) indicates that the result remained significant after controlling for multiple testing using the Benjamini–Hochberg false discovery rate procedure (q < 0.05).

| **Supplementary Table 7.** Regression analysis between individual clinical risk factors and organ aging acceleration | | | | | | | | |
| --- | --- | --- | --- | --- | --- | --- | --- | --- |
|  | **Artery**  **β (95% CI)** | **Interaction *P* value** | **Heart**  **β (95% CI)** | **Interaction *P* value** | **Kidney**  **β (95% CI)** | **Interaction *P* value** | **Conventional**  **β (95% CI)** | **Interaction *P* value** |
| **Total population** **(n=556)** | |  |  |  |  |  |  |  |
| Current smoker | -0.35 (-1.30, 0.60) | 0.780 | 0.16 (-0.75, 1.07) | 0.579 | **0.71 (0.17, 1.25) *** | 0.764 | 0.25 (-0.63, 1.14) | 0.724 |
| Hypertension | -0.06 (-0.64, 0.53) | 0.122 | -0.27 (-0.83, 0.29) | 0.951 | **0.57 (0.24, 0.90) *** | 0.353 | 0.06 (-0.49, 0.60) | 0.466 |
| BMI, kg/m2 | 0.00 (-0.07, 0.07) | 0.532 | -0.04 (-0.10, 0.03) | 0.452 | **0.12 (0.08, 0.15) *** | 0.144 | 0.04 (-0.02, 0.10) | 0.942 |
| Diabetes | **2.09 (1.01, 3.17) *** | 0.257 | 0.19 (-0.86, 1.24) | 0.551 | **1.33 (0.72, 1.95) *** | 0.077 | **1.21 (0.19, 2.22)** | 0.872 |
| Dyslipidemia | 0.34 (-0.25, 0.93) | 0.128 | -0.29 (-0.86, 0.28) | 0.129 | **0.34 (0.01, 0.68)** | 0.625 | 0.11 (-0.44, 0.67) | 0.378 |
| Creatinine, mg/dL | 0.28 (-2.05, 2.61) | 0.363 | 1.04 (-1.18, 3.27) | 0.531 | 0.53 (-0.72, 1.78) | 0.475 | 1.93 (-0.16, 4.01) | 0.340 |
| **Women (n=364)** | |  |  |  |  |  |  |  |
| Current smoker | -0.42 (-1.64, 0.80) |  | -0.17 (-1.22, 0.89) |  | 0.68 (-0.03, 1.38) |  | 0.33 (-0.78, 1.43) |  |
| Hypertension | -0.28 (-1.02, 0.46) |  | -0.19 (-0.83, 0.45) |  | **0.44 (0.02, 0.86)** |  | -0.06 (-0.73, 0.62) |  |
| BMI, kg/m2 | 0.00 (-0.08, 0.08) |  | -0.06 (-0.13, 0.01) |  | **0.13 (0.09, 0.18) *** |  | 0.03 (-0.04, 0.11) |  |
| Diabetes | **1.59 (0.08, 3.11)** |  | -0.04 (-1.35, 1.28) |  | **1.83 (0.97, 2.69) *** |  | 1.31 (-0.08, 2.69) |  |
| Dyslipidemia | 0.15 (-0.60, 0.89) |  | -0.50 (-1.14, 0.15) |  | 0.26 (-0.17, 0.69) |  | 0.33 (-0.35, 1.01) |  |
| Creatinine, mg/dL | 0.38 (-2.85, 3.61) |  | 0.84 (-1.98, 3.67) |  | -0.13 (-1.94, 1.69) |  | **3.16 (0.26, 6.07)** |  |
| **Men** **(n=193)** | |  |  |  |  |  |  |  |
| Current smoker | -0.50 (-1.99, 0.98) |  | 0.52 (-1.18, 2.22) |  | 0.82 (-0.05, 1.68) |  | 0.04 (-1.47, 1.55) |  |
| Hypertension | 0.39 (-0.54, 1.32) |  | -0.39 (-1.46, 0.67) |  | **0.82 (0.29, 1.34) *** |  | 0.28 (-0.65, 1.22) |  |
| BMI, kg/m2 | 0.00 (-0.13, 0.13) |  | 0.03 (-0.12, 0.18) |  | 0.06 (-0.01, 0.13) |  | 0.05 (-0.08, 0.18) |  |
| Diabetes | **2.49 (1.01, 3.96) *** |  | 0.30 (-1.43, 2.04) |  | 0.79 (-0.08, 1.65) |  | 1.04 (-0.47, 2.56) |  |
| Dyslipidemia | 0.81 (-0.14, 1.76) |  | 0.19 (-0.91, 1.29) |  | 0.49 (-0.06, 1.04) |  | -0.29 (-1.25, 0.67) |  |
| Creatinine, mg/dL | 0.50 (-2.70, 3.69) |  | 1.49 (-2.05, 5.05) |  | 1.13 (-0.55, 2.81) |  | 0.78 (-2.30, 3.87) |  |

BMI, body mass index. CI, confidence interval. The association between determinants and outcomes is assessed by linear regression models and the regression coefficient along with its 95% confidence interval is displayed. Analysis is adjusted for age and sex in the non-stratified analysis and for age only in the stratified analysis. Interaction p value: Indicates the statistical significance of differences in associations between men and women. Values in bold are statistically significant at *P* < 0.05. * indicates that the result remained significant after controlling for multiple testing using the Benjamini–Hochberg false discovery rate procedure.
